# Supplementary material for: A Comparison of Letrozole and Tamoxifen in Postmenopausal Women with Early Breast Cancer
Source: Atypon-hosted journal article supplement (doi:10.1056/nejmoa052258), 2005-12-28
Supplement: nejm_thuerlimann_2747sa.pdf [file nejm_thuerlimann_2747sa.pdf]

# Supplementary Appendixes 1 and 2

These appendixes have been provided by the authors to give readers additional information about their work.

Supplement to: The Breast International Group (BIG) 1-98 Collaborative Group. A comparison of letrozole and tamoxifen in postmenopausal women with early breast cancer. *N Engl J Med* 2005;353:2747-57.

## **Supplementary Appendix 1**

Participants in the BIG 1-98 Collaborative Group

## **Supplementary Appendix 2**

CONSORT (Consolidated Standards of Reporting Trials) flowchart of the BIG 1-98 trial and definitions of postmenopausal and endocrine-responsive disease.

## SUPPLEMENTARY APPENDIX 1

The following participated in the BIG 1-98 Collaborative Group: **Steering Committee:** B. Thürlimann (chair), L. Blacher, M. Castiglione-Gertsch, A.S. Coates, T. Cufer, J.F. Forbes, R.D. Gelber, A. Goldhirsch, A. Hiltbrunner, S.B. Holmberg, A. Keshaviah, A. Martoni, L. Mauriac, H.T. Mouridsen, K.N. Price, M. Rabaglio, A. Santoro, I.E. Smith, C. Straehle, G. Viale; *Novartis:* H.A. Chaudri-Ross, P. Dodion, D.B. Evans, W. Hackl, E. Raman, G. Taylor, E. Waldie; **Writing Committee:** B. Thürlimann, A. Keshaviah, A.S. Coates, H. Mouridsen, L. Mauriac, J.F. Forbes, R. Paridaens, M. Castiglione-Gertsch, R.D. Gelber, M. Rabaglio, I. Smith, A. Wardley, K.N. Price, A. Goldhirsch; **IBCSG Scientific Committee:** A. Goldhirsch, A.S. Coates (cochairs), L. Blacher, M. Castiglione-Gertsch, J.F. Forbes, R.D. Gelber, B.A. Gusterson, A. Hiltbrunner, C. Hürny, E. Murray, K.N. Price, M. Rabaglio, R. Studer, G. Viale, A. Wallgren; **IBCSG Foundation Council:** B. Thürlimann, M. Castiglione-Gertsch, A.S. Coates, J.P. Collins, H. Cortés Funes, R.D. Gelber, A. Goldhirsch, M. Green, A. Hiltbrunner, S.B. Holmberg, D.K. Hossfeld, I. Láng, J. Lindtner, F. Paganetti, C.-M. Rudenstam, R. Stahel, H.-J. Senn, A. Veronesi; **Coordinating Center (Bern, Switzerland):** M. Castiglione-Gertsch, A. Hiltbrunner, M. Rabaglio, G. Egli, B. Cliffe, S. Hofmann, F. Munarini, R. Kammler, N. Munarini, E. Alli, E. Marbot, I. Marti, M. Mathys, C. Pauli, R. Maibach, S. Dellapasqua, A. Balduzzi, F. Bologna, R. Studer, B. Ruepp; **Statistical Center (Dana-Farber Cancer Institute, Boston):** R.D. Gelber, K.N. Price, A. Keshaviah, H. Litman, L.J. Somos, B. Timmers, L. Nickerson; **Data-Management Center (Frontier Science and Technology Research Foundation, Amherst, N.Y.):** L. Blacher, T. Heckman Scolese, M. Belisle, M. Caporale, J. Celano, L. Dalfonso, L. Dooley, S. Fischer, K. Galloway, J. Gould, R. Hinkle, M. Holody, G. Jones, R. Krall, S. Lippert, J. Meshulam, L. Mundy, A. Pavlov-Shapiro, K. Scott, M. Scott, S. Shepard, J. Swick, L. Uhteg, D. Weinbaum, C. Westby, T. Zielinski; **Central Pathology Review Office:** B.A. Gusterson, E. Mallon (University of Glasgow, Glasgow, United Kingdom), G. Viale, P. Dell'Orto, M. Mastropasqua, B. Del Curto (European Institute of Oncology, Division of Pathology, Milan); **Data and Safety Monitoring Committee:** D.F. Hayes, J.E. Garber, S.W. Lagakos, I. Lindgren; **Study Coordination (Novartis, Basel, Switzerland):** E. Waldie, I. van Hooymissen, M. De Smet, W. Schmidt, A. Bolton, W. Hackl; **BIG-IBCSG: Australian- New Zealand Breast Cancer Trials Group:** R.D. Snyder, J.F. Forbes, A.S. Coates, D. Lindsay, D. Preece, J. Cowell, D. Talbot, A. Whipp; **Australia — The Cancer Council Victoria, Melbourne:** F. Abell, R. Basser, R. Bell, B. Brady, D. Blakey, P. Briggs, I. Burns, P. Campbell, M. Chao, J. Chirgwin, B. Chua, K. Clarke, J. Collins, R. De Boer, J.C. Din, R. Doig, A. Dowling, R. Drummond, N. Efe, S.T. Fan, M. Francis, P. Francis, V. Ganju, P. Gibbs, G. Goss, M. Green, P. Gregory, J. Griffiths, I. Haines, M. Henderson, R. Holmes, P. James, J. Kiffler, M. Lehman, M. Leyden, L. Lim, G. Lindeman, R. Lynch, B. Mann, J. McKendrick, S. McLachlan, R. McLennan, G. Mitchell, S. Mitra, C. Murphy, I. Parker, K. Phillips, I. Porter, G. Richardson, J. Scarlet, S. Sewak, J. Shapiro, R. Snyder, R. Stanley, C. Steer, D. Stoney, A. Strickland, G. Toner, C. Underhill, K. White, M. White, A. Wirth, S. Wong; *W.P. Holman Clinic, Launceston General Hospital, Launceston:* D. Byram, I. Byard; *Liverpool Hospital, Sydney:* S. Della-Fiorentina, A. Goldrick, E. Hovey, E. Moylan, E. Segelov; *Mount Hospital, Perth:* A. Chan, M. Buck, D. Hastrich, D. Ingram, G. Van Hazel, P. Willsher; *Nepean Cancer Care Centre, Sydney:* N. Wilcken, C. Crombie; *Newcastle Mater Hospital, Newcastle:* J.F. Forbes, F. Abell, S. Ackland, A. Bonaventura, S. Cox, J. Denham, R. Gourlay, D. Jackson, R. Sillar, J. Stewart; *Prince of Wales Hospital, Sydney:* C. Lewis, B. Brigham, D. Goldstein, M. Friedlander; *Princess Alexandra Hospital, Woollongabba:* E. Walpole, D. Thompson; *Royal Adelaide Hospital, Adelaide:* P.G. Gill, M. Bochner, J. Coventry, J. Kollias, P. Malycha, I. Olver; *Royal Brisbane and Women's Hospital, Brisbane:* M. Colosimo, R. Cheuk, L. Kenny, N. McCarthy, D. Wyld; *Royal Hobart Hospital, Hobart:* R. Young, R. Harrup, R. Kimber, R. Lowenthal; *Royal Perth Hospital, Perth:* J. Trotter, E. Bayliss, A. Chan, D. Ransom; *Sir Charles Gairdner Hospital, Perth:* M. Byrne, M. Buck, J. Dewar, A. Nowak, A. Powell, G. Van Hazel; *Toowoomba Hospital, Toowoomba:* E. A. Abdi, R. Brodribb, Z. Volobueva; *Westmead Hospital, Sydney:* P. Harnett, V. Ahern, H. Gurney, N. Wilcken; **New Zealand — Auckland Hospital, Auckland:** V.J. Harvey, B. Evans, W. Jones, M. McCrystal, D. Porter, P. Thompson, M. Vaughan; *Christchurch Hospital, Christchurch:* D. Gibbs, C. Atkinson, R. Burcombe, B. Fitzharris, B. Hickey, M. Jeffery, B. Robinson; *Dunedin Hospital, Dunedin:* B. McLaren, S. Costello, J. North, D. Perez; *Waikato Hospital, Hamilton:* I.D. Campbell, L. Gilbert, R. Gannaway, M. Jameson, I. Kennedy, J. Long, G. Round, L. Spellman, D. Whittle, D. Woolerton; **Brazil — Hospital de Clinicas de Porto Alegre, Porto Alegre:** C. Menke, J. Biazús, R. Cericatto, J. Cavalheiro, N. Xavier, A. Bittelbrunn, E. Rabin; **Chile — Chilean Cooperative Group for Oncologic Research:** J. Gutiérrez, R. Arriagada, L. Bronfman, M. Zúñiga; *Clinica Las Condes, Santiago:* J. Gutiérrez, J.C. Acevedo, S. Torres, A. León, E. Salazar; *Hospital Dipreca, Las Condes, Santiago:* L. Soto Diaz, R. Duval, N. Oddeshede, M. C. Venti; *Hospital San Juan de Dios, Santiago:* K. Peña, L. Puente, V. Maidana; *Instituto de Radiomedicina, Vitacura, Santiago:* R. Baeza, R. Arriagada, P. Olfos, J. Solé, E. Vinés, C. Mariani;

**Hungary** — *National Institute of Oncology, Budapest*: I. Láng, E. Hitre, E. Szabó, Z. Horváth, E. Ganofszy, E. Juhos; **Italy** — *Centro di Riferimento Oncologico, Aviano*: A. Veronesi, D. Crivellari, M.D. Magri, A. Buonadonna, F. Coran, E. Borsatti, E. Candiani, S. Massarut, M. Roncadin, M. Arcicasa, A. Carbone, T. Perin, A. Glohini; *Ospedali Riuniti di Bergamo, Bergamo*: C. Tondini, R. Labianca, P. Poletti, A. Bettini; *Ospedale degli Infermi, Biella*: M. Clerico, M. Vincenti, A. Malossi, E. Seles, E. Perfetti, B. Sartorello; *Spedali Civili, Brescia*: E. Simoncini, G. Marini, P. Marpicati, R. Farfaglia, A.M. Bianchi, P. Grigolato, L. Lucini, P. Frata, A. Huscher, E. Micheletti, C. Fogazzi; *Ospedale Capri, Capri, and Ospedale Mirandola, Mirandola*: F. Artioli, K. Cagossi, L. Scaltriti, E. Bandieri, L. Botticelli, G. Giovanardi; *Ospedale di Cattolica Cervesi, Cattolica*: A. Ravaioli, E. Pasquini, B. Rudnas; *Ospedale Civile, Gorizia*: L. Foghin; *Ospedale A. Manzoni Lecco, Lecco*: M. Visini, L. Zavallone, G. Ucci; *Istituto Europeo di Oncologia, Milan*: M. Colleoni, G. Viale, P. Veronesi, G. Peruzzotti, L. Corsetto, R. Ghisini, G. Renne, A. Luini, L. Orlando, R. Torrisi, A. Rocca, T. De Pas, E. Munzone, V. Galimberti, S. Zurrada, M. Intra, F. Nolè, R. Orecchia, G. Martinelli, F. de Braud, A. Goldhirsch; *Ospedale Infermi, Rimini*: A. Ravaioli, L. Gianni; **Peru** — *Instituto de Enfermedades Neoplásicas, Lima*: H. Gome; **Slovenia** — *Institute of Oncology, Ljubljana*: T. Cufer, B. Pajk, J. Cervek; **South Africa** — *Groote Schuur Hospital and University of Cape Town, Cape Town*: I.D. Werner, E. Murray, K. Pillay, S. Dalvie, T. Erasmus, B. Robertson, B. Read, E. Nel, J. Toop, N. Nedeva, E. Panieri; *Sandton Oncology Centre, Johannesburg*: D. Vorobiof, M. Chasen, G. McMichael, C. Mohammed; **Sweden** — *West Swedish Breast Cancer Study Group*: S.B. Holmberg; *Sahlgrenska University Hospital, Moelndal*: S.B. Holmberg, J. Mattsson; *Boras Hospital, Boras*: T. Hagström; *Karlstads Hospital, Karlstads*: H. Sellström; *Kungälv Hospital, Kungälv*: B. Lindberg; **Switzerland** — *Swiss Group for Clinical Cancer Research*: A. Goldhirsch, R. Herrmann; *Kantonsspital Aarau, Zentrum für Onkologie, Aarau*: A. Schönenberger, W. Mingrone, C. Honegger, E. Bärtschi, M. Neter, M. Rederer, G. Schär; *University Hospital Basel, Basel*: C. Rochlitz, R. Herrmann, D. Oertli, E. Wight, H. Moch; *Institute of Oncology of Southern Switzerland — Ospedale San Giovanni, Bellinzona*: J. Bernier, L. Bronz, F. Cavalli, E. Gallerani, A. Richetti, A. Franzetti; *Ospedale Regionale di Lugano (Civico Italiano), Lugano*: M. Conti-Beltraminelli, M. Ghielmini, T. Gyr, S. Mauri, P.C. Saletti; *Ospedale Regionale Beata Vergine, Mendrisio*: A. Goldhirsch, O. Pagani, R. Graffeo, M. Locatelli, S. Longhi, P.C. Rey, M. Ruggeri; *Ospedale Regionale La Carità, Locarno*: E. Zucca, D. Wyss; *Istituto Cantonale di Patologia, Locarno*: L. Mazzucchelli, E. Pedrinis, T. Rusca; *Inselspital, Bern*: S. Aebi, M.F. Fey, M. Castiglione-Gertsch, M. Rabaglio; *Kantonsspital Olten, Olten*: S. Aebi, M.F. Fey, M. Zuber, G. Beck; *Bürgerspital, Solothurn*: S. Aebi, M.F. Fey, R. Schönenberger; *Spital Thun-Simmmental, Thun*: J.M. Lüthi, D. Rauch; *Hôpital Cantonal Universitaire, Geneva*: H. Bonnefoi; *Rätisches Kantonos-/Regionalspital, Chur*: F. Egli, R. Steiner, P. Fehr; *Centre Pluridisciplinaire d'Oncologie, Lausanne*: L. Perey, P. de Grandi, W. Jeanneret, S. Leyvraz, J.-F. Delaloye; *Kantonsspital St. Gallen, St. Gallen*: B. Thürlimann, D. Köberle, F. Weisser, S., Mattmann, A. Müller, T. Cerny, B. Späti, M. Höfliger, G. Fürstenberger, B. Bolliger, C. Öhlschlegel, U. Lorenz, M. Bamert, J. Kehl-Blank, E. Vogel; *Kantonales Spital Herisau, Herisau*: B. Thürlimann, D. Hess, I. Senn, D. Köberle, A. Ehrsam, C. Nauer, C. Öhlschlegel, J. Kehl-Blank, E. Vogel; *Stadtspital Triemli, Zurich*: L. Widmer, M. Häfner; *Universitätsspital Zurich, Zurich*: B.C. Pestalozzi, M. Fehr, R. Caduff, Z. Varga, R. Trüb, D. Fink; **Swiss physicians in private practice - Zurich**: B.A. Bättig; *Sonnenhof-Klinik Engeried, Bern*: K. Buser; *Frauenklinik Limmattalspital, Schlieren*: N. Bürki; *Birsfelden*: A. Dieterle; *Biel*: L. Hasler; *Baar*: M. Mannhart-Harms; *Brust-Zentrum, Zurich*: C. Rageth; *Bern*: J. Richner; *Bellinzona*: V. Spataro; *Winterthur*: M. Umbricht; **United Kingdom** — *King's College Hospital/Breast Unit, London*: P. Ellis, S. Harris, N. Akbar, H. McVicars, C. Lees, R. Raman, G. Crane; **Danish Breast Cancer Cooperative Group (DBCG)** — H.T. Mouridsen; *Rigshospitalet, Copenhagen*: H.T. Mouridsen; *Vejle Hospital, Vejle*: E. Jakobsen; *Odense University Hospital, Odense*: S. Cold; *Kobenhavns Amttssygehuset Herlev/Herlev University Hospital, Herlev*: C. Kamby; *Aalborg Sygehus Syd, Aalborg*: M. Ewertz; *Hilleroed Hospital, Hilleroed*: P.M. Vestlev; *Aarhus University Hospital, Aarhus*: J. Andersen; *Roskilde County Hospital, Roskilde*: P. Grundtvig; *Esbjerg Central Hospital, Esbjerg*: E. Sandberg; *Naestved Central Hospital, Naestved*: P. Philip; *Soenderborg Sygehus, Soenderborg*: E.L. Madsen; *Herning Central Hospital, Herning*: K.A. Moeller; *Viborg Sygehus, Viborg*: V. Haahr; *Landsptali University Hospital, Reykjavik, Iceland*: J. Johansson; **French Group: Federation Nationale des Centres de Lutte Contre le Cancer (FNCLCC)** — L. Mauriac; *Centre Hospitalier de la Côte Basque, Bayonne*: D. Larregain-Fournier, S. Remy; *Institut Bergonié, Bordeaux*: L. Mauriac, P. Campo; *Centre Jean Perrin, Clermont-Ferrand*: H. Auvray; *Centre Georges François Leclerc, Dijon*: C. De Gislain, F. Delille, M.-C. Porteret; *Centre Oscar Lambret, Lille*: V. Servent, M. Chapoutier; *Centre Hospitalier Regional Universitaire de Limoges, Limoges*: N. Tubiana-Mathieu, S. Lavau-Denes, P. Bosc; *Centre Léon Bérard, Lyon*: J.P. Guastalla, T. Bachelot, C. Arbault; *Centre Hospitalier Meaux, Meaux*: G. Netter-Pinon; *Centre Hospitalier Général André Boullouche, Montbéliard*: A. Monnier, Y. Hammoud; *Centre Paul Lamarque, Montpellier*: G. Romieu, L. Culine, V. Pinosa; *Clinique Francheville, Périgueux*: L. Cany, C. Maguire;

Hôpital de la Milétrie, Poitiers: A. Daban, M. Le Saux, C. Grandon; Centre Eugène Marquis, Rennes: P. Kerbrat, C. Catheline; Centre Henri Becquerel, Rouen: C. Veyret, E. Jugieau, V. Talon; Centre René Gauducheau, Saint-Herblain: A. Le Mevel, S. Maury; Centre Claudius Régaut, Toulouse: L. Gladieff, N. Lignon; **North Yorkshire Group** — Harrogate District Hospital, Harrogate, North Yorkshire: D. Dodwell; Huddersfield Royal Infirmary, Huddersfield: J. Joffe; Castlehill Hospital, Hull: P. Drew; Airedale General Hospital, Keighley, West Yorkshire: A. Nejim; Leeds General Infirmary, Leeds: D. Dodwell, K. Horgan; St. James's University Hospital, Leeds: M. Lansdown, T. Perren; Weston Park Hospital, Sheffield: R.E. Coleman; **Independent Centers and Groups — Argentina:** Centro Oncológico Confidence, Buenos Aires: D. Campos; Hospital Allemán, Buenos Aires: F. Cópola; Hospital Británico, Buenos Aires: J. Martinez; Hospital Evita, Buenos Aires: M. Freue; Hospital Posadas, Buenos Aires: C. Wainstein; Hospital Zubizarreta, Buenos Aires: A. Zori Comba; Instituto Dr. Estevez, Buenos Aires: E. Cazap; Instituto Oncológico Dr. Angel H. Roffo, Buenos Aires: E. Mickiewicz; Sanatorio Municipal Julio A. Mendez, Buenos Aires: L. Balbiani; Centro Privado de Ginecología, Córdoba: A. Osuna; Hospital Privado de Córdoba, Córdoba: E. Palazzo; Instituto Modelo de Ginecología y Obstetricia, Córdoba: M. de Romedis; Fundación Mainetti-Centro Oncológico de Excelencia, La Plata: S. Cagnolati; Hospital Privado de la Comunidad, Mar del Plata: C.A. Delfino, G. Caccia; Escuela de Medicina Nuclear, Mendoza: R.L. de Angelis; Centro Oncológico de Rosario, Rosario: L. Fein, R. Sala; Hospital Provincial de Rosario, Rosario: C. Nassurdi, A. Colombo Berra; Clínica Especializada Isis, Santa Fe: R. Viroglio, C. Blajman; Hospital Regional de Concepción, Tucumán: H. Requejo; Instituto de Maternidad y Ginecología Nuestra Señoras de las Mercedes, Tucumán: L. Silberman; **Australia** — Flinders Medical Centre, Adelaide: S. Birrell, M. Eaton, C. Hoffman; Queen Elizabeth Hospital, Adelaide: V. Humeniuk; Canberra Hospital, Canberra: P. Craft, R. Stuart-Harris, D. Yip; Geelong Hospital, Geelong: R. Bell, F. Abell, M. Francis, J. Kiffer, R. Lynch, R. McLennan, K. White; Royal Melbourne Hospital, Melbourne: M. Green, R. Bassar, J. Collins, R. De Boer, J.C. Din, N. Efe, S.T. Fan, G. Lindeman, S. Wong; Western General Hospital, Melbourne: M. Green, R. Bassar, J. Collins, R. De Boer, J. C. Din, N. Efe, S.T. Fan, G. Lindeman, S. Wong; Newcastle Mater Hospital, Newcastle: J. Stewart, F. Abell, S. Ackland, A. Bonaventura; Royal Perth Hospital, Perth: J. Trotter, E. Bayliss, A. Chan, D. Ransom, A. Redfern; St. George Hospital, Sydney: P. de Souza, M. Links; St. Vincent's Hospital, Sydney: D. Dalley, J. Grygiel, R. Ward; Murray Valley Private Hospital, Wodonga: C. Underhill, K. Clarke, C. Steer; Princess Alexandra Hospital, Woolloongabba: E. Walpole, D. Thompson; **Belgium** — Institut Jules Bordet, Brussels: J.M. Nogaret; University Hospitals Leuven, Leuven: I. Vergote; Les Cliniques Saint-Joseph Association sans But Lucratif, Liège: C. Focan; Clinique du Parc Léopold, Brussels: L. Marcellis; Centre Hospitalier Etterbeek – Ixelles, Brussels: J.P. Kains; Dienst Gezwelliekten, Leuven: R. Paridaens; Service d'Oncologie Clinique Notre-Dame, Charleroi: J.-L. Canon; Centre Hospitalier Universitaire André Vèsale, Montigny-Le Tilleul: D. Brohère; **Canada** — Cambridge Memorial Hospital, Cambridge: J. Gowing; Centre Hospitalier de l'Université de Montréal – Campus Notre-Dame, Montreal: L. Yelle; Hôpital Maisonneuve-Rosemont, Montreal: P. Dubé; **Chile** — Fundación Lopez Perez, Santiago: C. Vogel; Hospital Carlos Van Buren, Valparaíso: M. León Prieto; **Czech Republic** — Institute of Oncology, Brno: K. Petrakova, M. Palacova, R. Demlova; Hospital Ceske Budejovice, Ceske Budejovice: H. Siffnerova, J. Fischer, I. Bustova; Centre of Breast Diseases, Prague: H. Kankova, M. Pintova; Institute of Radiation Oncology, Prague: P. Vitek; University Hospital, Prague: J. Abrahamova, D. Kordikova, L. Petruzalka, E. Sedlackova, H. Honova; **Germany** — Onkologische Gemeinschaftspraxis, Augsburg: B. Heinrich; Zentralklinikum/Frauenklinik, Augsburg: A. Wischnik; Universitätsklinikum Essen, Essen: C. Oberhoff, A.E. Schindler; Universitäts-Frauenklinik der Julius-Liebig-Universität Giessen, Giessen: K. Münstedt; Onkologische Gemeinschaftspraxis, Göttingen: D. Meyer; Martin-Luther-Universität Halle-Wittenberg, Halle: R. Grosse, H. Kölbl; Universitätsklinik des Saarlandes, Homburg: W. Schmidt, D. Mink; Universitäts-Frauenklinik und Poliklinik Universitätskrankenhaus Eppendorf, Hamburg: F. Jänicke; Kliniken der Medizinischen Hochschule, Frauenklinik, Hannover: H.J. Lück; Krankenhaus Mutterhaus der Borromäerinnen, Trier: W. Dornoff; Gynäkologische Abteilung des St. Josefhospital, Wiesbaden: G. Hoffmann; Gynäkologische Abteilung des Marienhospitals, Universität Witten-Herdecke, Witten: J. Hackmann, W. Bader; **Hungary** — Szegedi Orvostudományi Egyetem Onkoterápiás Klinika, Szeged: Z. Kahan; B.M. Központi Kórház, Budapest: G. Pajkos, K. Kristo; Semmelweis Orvostudományi Egyetem Radiológiai és Onkoterápiás Klinika, Budapest: M. Dank; Uzsoki Utcai Kórház, Budapest: T. Nagykalnai, L. Landherr; Almási Balogh Pál Kórház, Ózd: E. Kner; Teületi Kórház Onkológia, Szentes: M. Kispál; Szent Borbála Kórház, Megyei Onkológiai Gondozó, Tatabánya: Á. Dani; **Italy** — Policlinico Sant'Orsola Malpighi, Bologna: A. Martoni, C. Zamagni, S. Giaquinta, E. Piana; Ospedale S. Croce, Fano: R. Mattioli, L. Imperatori; Istituto Clinica Humanitas, Milan/Rozzano: A. Santoro, C. Carnaghi, L. Rimassa; Azienda Ospedaliera San Filippo Neri, Rome: G. Gasparini, G. Sciarretta, A. Morabito; Azienda Ospedaliera Treviglio-Caravaggio, Treviglio: S. Barni, M. Cazzaniga, M. Cabiddu; Policlinico Universitario, Udine: F. Puglisi; Ospedale di Torrette,

Ancona: R. Cellerino, S. Antognoli, F. Freddari; *University of Cagliari, Policlinico Universitario, Cagliari*: G. Mantovani, E. Massa, G. Astara; *Ospedale Civile Feltre, Feltre*: R. Segati; *Istituto Nazionale Ricerca Cancro, Genoa*: R. Rosso, L. Del Mastro, M. Venturini, C. Bighin; *Istituto Nazionale dei Tumori, Milan*: E. Bajetta, N. Zilembo, D. Paleari, G. Procopio; *Azienda Ospedaliera di Parma, Parma*: S. Salvagni, M. A. Perrone, F. Franciosi; *Azienda Ospedaliera S. Salvatore, Pesaro*: G. Catalano, S. Luzi Fedeli; *Azienda Ospedaliera Ospedale di Circolo e Fondazione Macchi, Varese*: G. Pinotti, G. Giardina, I. Vallini; *University of Cagliari, Policlinico Universitario, Cagliari*: B. Massidda, M.T. Ionta, M.C. Deidda; *Ospedale Maggiore, Lodi*: G. Nalli, G. Sita; *Policlinico Universitario, Palermo*: I. Carreca, S. Cucciarré, D. Burgio; *Ospedale Civile dello Spirito Santo, Pescara*: M. Lombardo, G. Pandoli, P. Di Stefano; *Azienda Ospedaliera Santa Maria Nuova, Reggio Emilia*: C. Boni, G. Bisagni, M.C. Banzi, P. Linarello; *Azienda Ospedaliera Desenzano del Garda, Manerbio*: G. Colosini, A. Spasiano, A. Caldonazzo; *Ospedale Civile Azienda Sanitaria Locale 20, Tortona*: M.G. Pacquola; **the Netherlands** — *Ziekenhuis Leyenburg, The Hague*: H.P. Sleebloom; *Catharina Ziekenhuis, Eindhoven*: H.J.T. Rutten; *St. Anna Ziekenhuis, Geldrop*: E.J.T. Luiten; *Tweesteden Ziekenhuis, Tilburg*: H.T.J. Roerdink; *Maxima Medisch Centrum, Veldhoven*: R.H.M. Roumen; **New Zealand** — *Dunedin Hospital, Dunedin*: B. McLaren, S. Costello, J. North, D. Perez, K., Bayston, M. Pfeiffer; *Waikato Hospital, Hamilton*: I. Kennedy, I.D. Campbell, L. Gilbert, R. Gannaway, M. Jameson, J. Long, G. Round, L. Spellman, D. Whittle, D. Woolerton; **Poland** — *Medical University of Gdansk, Gdansk*: J. Jassem, M. Welnicka-Jaskiewicz, E. Senkus-Konefka, K. Matuszewska; *Rydygier's Memorial Hospital, Krakow-Nova Huta*: P. Koralewski, J. Pernal; *Klinika Nowotworów Piersi i, Chirurgii Rekonstrukcyjnej-Warszawa, Warsaw*: T. Pienkowski, E. Brewczynska, B. Bauer-Kosinska, R. Sienkiewicz-Kozłowska, A. Jagiello-Gruszfeld, K. Sudol; *Centrum Onkologii w Bydgoszczy, Oddział Onkologii Klinicznej, Bydgoszcz*: J. Tujakowski, B. Zurawski; *Collegium Medicum Jagiellonian University, Krakow*: J. Pawlega, E. Jablonska, A. Zygulska; *Oddział Kliniczny Onkologiczny, Centralnego Szpitala Klinicznego Wojskowej, Akademii Medycznej-Warszawa, Warsaw*: M. Górnasiowa; *Dolnoslaskie Centrum Onkologii, Wrocław*: E. Filypczyk-Cisarz, K. Pajak; **Portugal** — *Hospital de S. João, Porto*: M. Damasceno; *Instituto Português de Oncologia de Coimbra, Coimbra*: J.Q. Albano; *Hospital de Santa Maria, Lisbon*: B. da Costa, L. Costa; *Instituto Português de Oncologia de Lisboa, Lisbon*: A. Henriques, H. Amaral; *Hospital Geral de Santo António, Porto*: F. Marques; **Russia** — *Cancer Research Center, Moscow*: D.V. Komov, S.B. Polikarpova; *Moscow Municipal Hospital No. 62, Moscow*: A.N. Makhson, N.V. Zabaznyi; *Moscow Research Institute of Diagnostics and Surgery, Moscow*: E.K. Vozny, N.Y. Dobrovolskaya, S. Bolshakova, O.V. Yurgina; *N.M. Emmanuel Institute of Biochemical Physics, Moscow*: D.B. Korman, I.A. Maslova; *N.N. Petrov Research Institute of Oncology, St. Petersburg*: V. Semiglazov, V. Ivanov; *Saint Petersburg City Oncological Dispensary, St. Petersburg*: G. Manikhas, G. Dolmatov; **South Africa** — *Mamma Clinic, Tygerberg Hospital, Cape Town*: J. Apffelstaedt; *Southern Cross Hospital, Cape Town*: D. Eedes; *Pretoria Academic Hospital, Pretoria*: C. Slabber; *Pretoria East Hospital, Pretoria*: M.A. Coccia-Portugal; *Eastern Cape Oncology Centre, Port Elizabeth*: K. Maart; **Spain** — *Hospital Ruber Internacional, Madrid*: J.E. Alés Martínez, P. Aramburo, R. Sánchez; *Hospital Son Dureta, Palma de Mallorca*: J. Rifa, J. Martin; *Centro Oncológico Integral de Madrid, Madrid*: R. Pérez-Carrión, J.L. González Larriba, A. Cubillo; *Hospital Universitario San Carlos, Madrid*: M.M. Jiménez, A. Casado; *Hospital Central de Asturias, Oviedo*: J. Fra, J.M. Vieitez, E. Esteban, A.J. Lacave; **Switzerland** — *Universitätsfrauenklinik, Basel*: E. Wight, S. Bartens, R. Decio, U. Güth; *Klinik am Park, Zurich*: U. Breitenstein; **Turkey** — *Ankara University Ibni Sina Hospital, Ankara*: F. Icli, D. Dincol; *Hacettepe University Oncology Institute, Ankara*: E. Baltali, Y. Ozisik; *Istanbul University Oncology Institute, Istanbul*: E. Topuz, M. Basaran, A. Aydiner; *Ege University Medical School, Izmir*: E. Ozdedeli; *9 Eylul University Medical School, Izmir*: O. Harmancioglu, A.U. Yilmaz; **United Kingdom** — *Royal Marsden Hospital, London*, *Royal Marsden National Health Service Trust, Surrey*: I.E. Smith; *University of Dundee, Dundee*: A.M. Thompson; *Christie Hospital National Health Service Trust, South Manchester University Hospital Trust, Manchester*: A. Wardley; *Royal Bournemouth Hospital, Bournemouth*: T. Hickish; *North Middlesex Hospital, London*: F. Neave; **Uruguay** — *Hospital de Clinicas Dr. Manuel Quintela, Montevideo*: G. Sabini.

## SUPPLEMENTARY APPENDIX 2

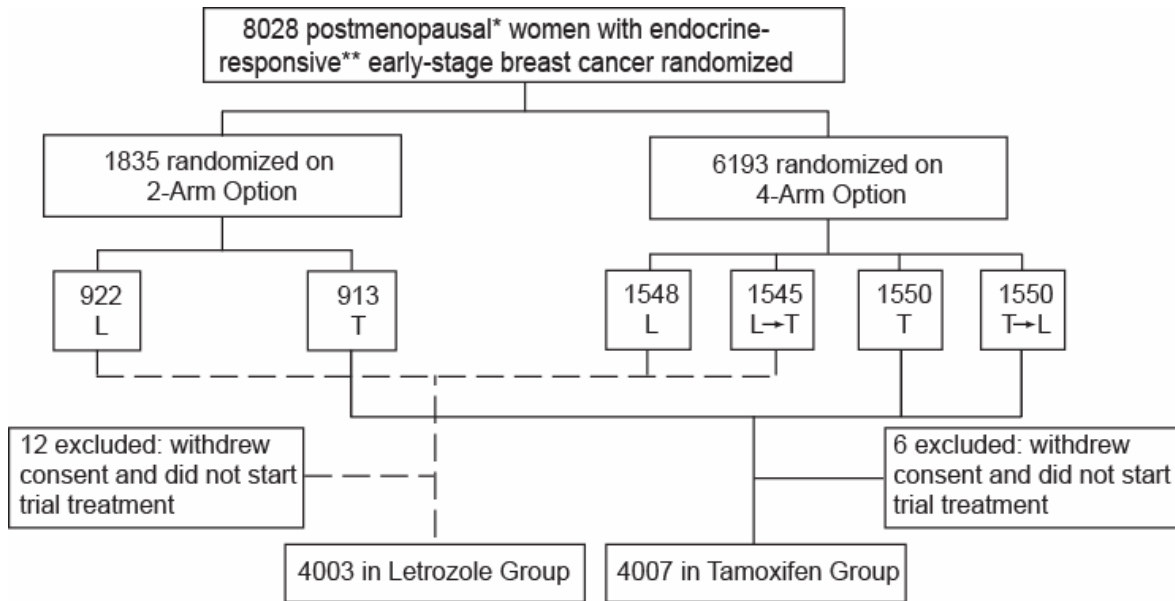

### \*Definition of postmenopausal:

Regardless of HRT or hysterectomy:

- Surgical bilateral oophorectomy AND any age
- Radiation castration AND amenorrheic for  $\geq 3$  months AND any age
- Not postmenopausal at the start of adjuvant chemotherapy AND completed  $\geq 6$  cycles CMF or  $\geq 4$  cycles AC AND age  $\geq 45$  AND FSH/LH/E2 postmenopausal levels

No HRT:

- Hysterectomy AND age  $< 55$  AND FSH/LH/E2 postmenopausal levels prior to chemotherapy
- Hysterectomy AND age  $\geq 55$

No HRT and No Hysterectomy:

- Amenorrhea  $> 1$  year AND age  $< 50$
- Amenorrhea  $> 6$  months AND age  $\geq 50$

HRT (Regardless of hysterectomy):

- HRT stopped for  $\geq 1$  month AND age  $< 55$  AND FSH/LH/E2 postmenopausal levels prior to chemotherapy
- HRT stopped for  $\geq 1$  month AND age  $\geq 55$

FSH/LH/E2 postmenopausal levels prior to chemotherapy and not categorized above

HRT=Hormone replacement therapy, received within three months of randomization.

HRT received more than 3 months prior to randomization is considered "No HRT."

### \*\*Definition of endocrine-responsive disease:

Estrogen receptor and/or progesterone receptor positive:

- $\geq 10$  percent tumor cells positive by immunohistochemistry proportion score (available for 93 percent of patients)
- $\geq 10$  fmol/mg cytosol protein by ligand binding assay

**Figure 1 Supplemental Appendix 2.** CONSORT (Consolidated Standards of Reporting Trials) flowchart of the BIG 1-98 trial. The primary core analysis includes all 8010 assessable patients, but events and follow-up in the sequential treatment groups (L→T and T→L) are truncated at 30 days after switching to the other treatment. Definitions of postmenopausal and endocrine-responsive disease are given. L denotes letrozole and T tamoxifen.
